# Supplementary material for: The histone deacetylase inhibitor, LBH589, promotes the systemic cytokine and effector responses of adoptively transferred CD8+ T cells
Source: PubMed Central journal article supplement (PMC4105687; doi:10.1186/2051-1426-2-8), 2014-04-15

Non-tumor bearing: day 3

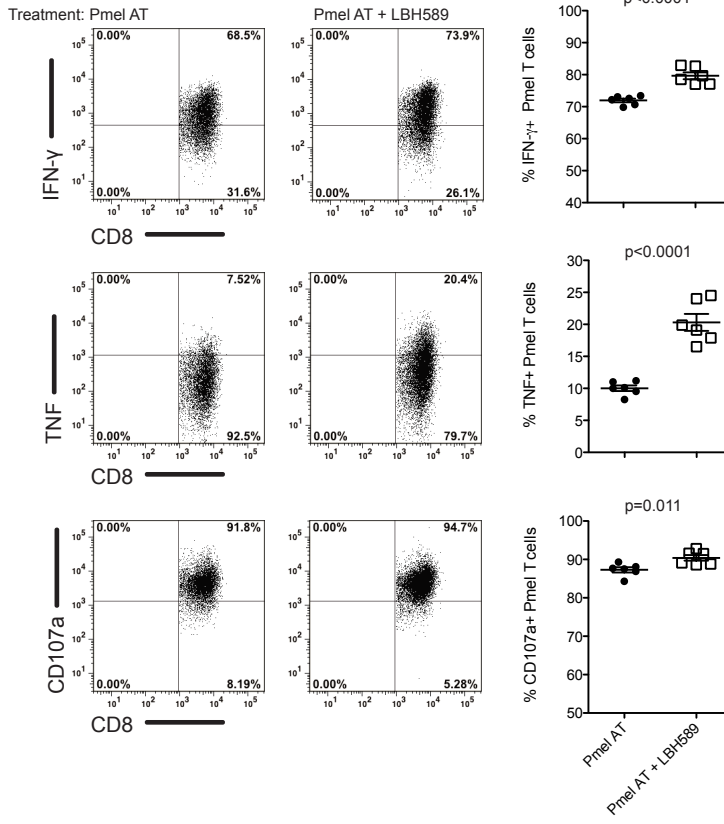

Supplement: 2051-1426-2-8-S1.pdf [file 2051-1426-2-8-S1.pdf]
